# Supplementary material for: The Role of Probation in Forensic Assertive Community Treatment
Source: Atypon-hosted journal article supplement (doi:10.1176/ps.62.4.pss6204_0418), 2011-04-01
Supplement: lamberti_ds1.pdf [file lamberti_ds1.pdf]

## APPENDIX A: Telephone Survey Instrument

1. Program contact information:
  - a. Contact Name:
  - b. Contact Title/Role:
  - c. Contact Phone Number:
  - d. Program Name:
  - e. Program Location:
  - f. Year of Service Initiation
  
2. Primary funding source(s) for the program? (1=Yes; 2=No; 3=Don't Know)
  - a. Billable Revenue: \_\_\_\_\_
  - b. Contracts: \_\_\_\_\_
  - c. (From where? \_\_\_\_\_)
  - d. Grants: \_\_\_\_\_
  - e. (From where? \_\_\_\_\_)
  - f. Plans in place for continuation funding? \_\_\_\_\_
  
3. Does the program have an Assertive Community Treatment team with the following key components? (1=Yes; 2=No; 3=Don't Know)
  - a. In-vivo service delivery? \_\_\_\_\_
  - b. Time-unlimited services? \_\_\_\_\_
  - c. High staff to patient ratio (1:10 or higher)? \_\_\_\_\_
  - d. High psychiatrist to client ratio (1:100 or higher)? \_\_\_\_\_
  - e. 24-hour, 7 day availability? \_\_\_\_\_
  - f. Substance abuse counselor on staff? \_\_\_\_\_
  - g. DACTS (Dartmouth ACT Scale) score, if available? \_\_\_\_\_
  - h. Describe the main area(s) where fidelity to the ACT model is lacking: \_\_\_\_\_
  
4. Diagnostic breakdown of ACT team clients:
  - a. Approximately what % of clients have schizophrenia or schizoaffective disorder? \_\_\_\_\_
  - b. Approximately what % of clients have bipolar disorder? \_\_\_\_\_
  - c. Approximately what % of clients have a co-occurring substance use disorder? \_\_\_\_\_
  - d. Approximately what % of clients have antisocial personality disorder? \_\_\_\_\_
  - e. Approximately what % of clients have antisocial personality traits? \_\_\_\_\_
  - f. Does your program provide cognitive behavioral treatment for antisocial beliefs, attitudes and cognitions? (1=Yes; 2=No; 3=Don't Know) \_\_\_\_\_

If so, describe:

5. Criminal Justice History: (1=Yes; 2=No; 3=Don't Know)
- a. Is history of criminal justice system involvement a requirement for admission to your ACT team? \_\_\_\_\_  
If so, describe how: \_\_\_\_\_
  - b. Approximately what % of clients served by your ACT team have been in jail or prison? \_\_\_\_\_
  - c. Approximately what % of clients served by your ACT team have histories of felony convictions? \_\_\_\_\_
  - d. Are clients with histories of violent crime (assault, rape, murder) eligible for ACT team enrollment? \_\_\_\_\_
  - e. Approximately what % of clients served by your ACT team have histories of violent crime? \_\_\_\_\_
  - f. Does your program use any standardized tool such as the Level of Service Inventory to assess the risk of criminal recidivism among your clients? \_\_\_\_\_
6. Approximately what % of clients are on probation (a) or parole (b) on admission?  
a. \_\_\_%    b. \_\_\_%
7. Approximately what % of clients served by your ACT team are men?  
\_\_\_\_%
8. Approximately what % of clients served by your ACT team re non-white?  
\_\_\_\_%  
(African-American, Hispanic, Native American, Asian American, Other)
9. Approximately what % of ACT team staff working directly with clients are non-white? (African-American, Hispanic, Native American, Asian American, Other)  
\_\_\_\_%
10. Approximately what % of clients served by your ACT team are homeless on admission?    \_\_\_\_ %
11. Number of clients currently enrolled in your ACT team?    \_\_\_\_
12. Maximum program capacity?  
(How many clients can it enroll at one time given current funding and staffing)  
\_\_\_\_
13. Primary Referral Sources?
- a. #1:    \_\_\_\_\_
  - b. #2:    \_\_\_\_\_
  - c. #3    \_\_\_\_\_
14. Does your program offer special residential services beyond those that currently exist in the community? (1=Yes; 2=No; 3=Don't Know)  
\_\_\_\_

If so, please describe:

15. Does your ACT team have any special working arrangements with criminal justice agencies to divert clients from jail? (1=Yes; 2=No; 3=Don't Know). If so, describe.

a. Law Enforcement? \_\_\_\_\_  
b. If so, describe

c. Probation? \_\_\_\_\_  
d. If so, describe

e. Parole? \_\_\_\_\_  
f. If so, describe

g. Pre-trial Services? \_\_\_\_\_  
h. If so, describe

i. Courts? \_\_\_\_\_  
j. If so, describe

k. Corrections? \_\_\_\_\_  
l. If so, describe

m. Other? \_\_\_\_\_  
n. If so, describe

**IF THE ACT TEAM DOES NOT COLLABORATE WITH PROBATION OFFICER(S), STOP HERE: "THANK YOU FOR YOUR TIME"**

16. Are clients in your program who are on probation assigned to "special" probation officer or to "regular" probation officers? (1=Special; 2=Regular)  
\_\_\_\_\_

17. If special probation officers are involved, describe what makes them special (1=Yes; 2=No; 3=Don't Know)

- a. Special training \_\_\_\_\_
- aa. If yes, describe: \_\_\_\_\_
- b. Special role \_\_\_\_\_
- bb. If yes, describe: \_\_\_\_\_
- c. ACT team member \_\_\_\_\_
- cc. If yes, what percent of ACT team meetings do they attend? \_\_\_\_\_
- d. Other (i.e. small case load, full time work with team, etc.) \_\_\_\_\_

**18.** For probation officers who work closely with the ACT Team, please describe their role including how many hours they spend each week and their primary responsibilities:

- a. Weekly hours? \_\_\_\_\_
- b. Primary Responsibilities:

**19.** a. Please describe how the idea to include probation officers who work closely with the ACT Team came about (who decided it, a mental health or probation official? Was it part of a special grant or program?):

b. For how many years has probation worked closely with the ACT team?

**20.** Does the probation officer who works closely with the ACT Team perform outreach? Please describe:

- a. Outreach? (1=Yes; 2=No; 3=Don't Know)

\_\_\_\_\_  
b. Description:

**21.** Does the probation officer who works closely with the ACT Team only provide input on patients who are on probation? (1=Yes; 2=No; 3=Don't Know)

b. What percentage of the patients on the ACT team are currently on probation or parole?

**22.** How often do ACT team clinicians and the probation officer agree on how to manage patients *in general*?

- a. Never
- b. Rarely
- c. Sometimes
- d. Usually
- e. Always

**23.** How often do ACT team clinicians and the probation officer agree *about when to use legal sanctions such as arrest and incarceration* upon patients on the team?

- a. Never
  - b. Rarely
  - c. Sometimes
  - d. Usually
  - e. Always
24. How helpful has it been to have a probation officer work closely with the ACT team in the general management of patients?
- a. Not Helpful
  - b. Rarely Helpful
  - c. Sometimes Helpful
  - d. Usually Helpful
  - e. Always Helpful
25. What impact has having a probation officer working closely with the ACT team had on the risk of patients being psychiatrically hospitalized?
- a. Very negative – patients are at much higher risk for hospitalization
  - b. Negative – patients are at higher risk for hospitalization
  - c. None – patients are at some risk for hospitalization
  - d. Positive – patients are at lower risk for hospitalization
  - e. Very Positive – patients are at much lower risk for hospitalization
26. What impact has having a probation officer working closely with the ACT team had on the risk of patients being arrested?
- a. Very negative – patients are at much higher risk for arrest
  - b. Negative – patients are at higher risk for arrest
  - c. None – patients are at some risk for arrest
  - d. Positive – patients are at lower risk for arrest
  - e. Very Positive – patients are at much lower risk for arrest
27. How *available* has the probation officer been in collaborating with ACT team clinicians about the care of patients on the team?
- a. Not at all
  - b. Slightly
  - c. Moderately
  - d. Very
  - e. Exceptionally
28. To what extent to ACT Team clinicians and the probation officer *collaborate* together in planning the care of patients on the team?
- a. Not at all
  - b. Slightly
  - c. Moderately
  - d. Very
  - e. Exceptionally

- 29.** To what extent does the probation officer *listen* to ACT Team clinicians' thoughts and opinions about the care of the patients on the team?
- Never
  - Rarely
  - Sometimes
  - Usually
  - Always
- 30.** To what extent does the probation officer *respect* the perspective of ACT Team clinicians as mental health professionals?
- Not at all
  - Slightly
  - Moderately
  - Very
  - Exceptionally
- 31.** a. How are probation officers that work closely with the ACT team paid? (Dept of Corrections? Community Mental Health Center? The Court?)
- b. Are the officers housed in the same building as the ACT team, or are they housed at another location?
- 32.** Please describe the primary barriers or challenges that you have encountered with having a probation officer work closely with your ACT Team?
- 33.** a. Do you have evidence of the effectiveness of the team? (1=Yes, 2=No, 3=Don't know)
- b. If so, how?
- 34.** a. Have you ever heard of "Forensic Assertive Community Treatment?" (1=Yes; 2=No; 3=Don't Know)
- Do you consider yourself to be a FACT program?
