# Supplementary material for: The Role of Probation in Forensic Assertive Community Treatment
Source: Atypon-hosted journal article supplement (doi:10.1176/ps.62.4.pss6204_0418), 2011-04-01
Supplement: lamberti_ds2.pdf [file lamberti_ds2.pdf]

## APPENDIX B

### Forensic assertive community treatment programs with probation components

| Program name                                               | Location           | Year of initiation | Primary funding source(s)                                             |
|------------------------------------------------------------|--------------------|--------------------|-----------------------------------------------------------------------|
| ACT Special Needs Offender Program                         | Dallas, TX         | Unknown            | Billable revenue, state contract                                      |
| Forensic Diversion Program, Special Needs Offender Program | Dallas, TX         | Unknown            | Billable revenue, state contract                                      |
| Specialized Supervision Forensic Program                   | Williamsport, PA   | 1998               | State contract                                                        |
| Mental Health Treatment Court                              | Williamsport, PA   | 1998               | Billable revenue, state contract                                      |
| Integrated Forensic Team                                   | Modesto, CA        | 1999               | Billable revenue, state grant                                         |
| Citywide Case Management Forensics                         | San Fransisco, CA  | 1999               | Billable revenue, county and state contract, state and private grants |
| STAR Program                                               | San Rafael, CA     | 2000               | Billable revenue, county contract, state grant                        |
| FOREST (Forensic Resource Team)                            | Butte County, CA   | 2001               | State and other grants                                                |
| FACT                                                       | San Antonio, TX    | 2005               | Billable revenue                                                      |
| Columbia River Mental Health                               | Vancouver, WA      | 2005               | Billable revenue, county contract, SAMHSA grant                       |
| Center Star ACT                                            | San Diego, CA      | 2006               | Billable revenue, county contract                                     |
| WIT (Whatever It Takes)                                    | Orange County, CA  | 2006               | Billable revenue, state contract                                      |
| Competency Restoration Program, ADAPT of TX                | Dallas, TX         | 2007               | Billable revenue, state contract                                      |
| Mentally Ill Offender Reduction Program                    | Madera, CA         | 2008               | Billable revenue, state grant                                         |
| Telecare FACT Program                                      | San Bernardino, CA | 2008               | Billable revenue, state contract                                      |

## APPENDIX C

### Program referral sources, eligibility, and capacity

| Program Name                                               | Primary Referral Source  | Secondary Referral Source | Patients with violent crime eligible? | Maximum capacity |
|------------------------------------------------------------|--------------------------|---------------------------|---------------------------------------|------------------|
| ACT Special Needs Offender Program                         | State forensic hospitals | Community mental health   | Yes                                   | None reported    |
| Forensic Diversion Program, Special Needs Offender Program | Jail                     | Probation                 | Yes                                   | None reported    |
| Specialized Supervision Forensic Program                   | Police                   | Prison                    | No                                    | 15               |
| Mental Health Treatment Court                              | Police                   | Community mental health   | No                                    | 15               |
| Integrated Forensic Team                                   | Probation                | Community mental health   | Yes                                   | 40               |
| Citywide Case Management Forensics                         | Jail                     | Community mental health   | Yes                                   | 150              |
| STAR Program                                               | Jail                     | Judges                    | Yes                                   | 75               |
| FOREST (Forensic Resource Team)                            | Court, post-adjudication | Probation                 | No                                    | 55               |
| FACT                                                       | Jail                     | State forensic hospital   | Yes                                   | 100              |
| Columbia River Mental Health                               | Probation                | Corrections               | Yes                                   | 53               |
| Center Star ACT                                            | Jail                     | Probation                 | Yes                                   | 110              |
| WIT (Whatever It Takes)                                    | Court                    | Probation                 | No                                    | 90               |
| Competency Restoration Program, ADAPT of TX                | Court                    | NA                        | Yes                                   | Na               |
| Mentally Ill Offender Reduction Program                    | Jail                     | Probation                 | Yes                                   | 76               |
| Telecare FACT Program                                      | County forensic program  | Jail                      | Yes                                   | 50               |

## APPENDIX D

### Probation collaborations within forensic assertive community treatment programs

| Program name                                               | Mental health training for probation officers | Hours per week | Team meeting attendance (%) | Duration of probation involvement (years) | Funding source for probation officer                  |
|------------------------------------------------------------|-----------------------------------------------|----------------|-----------------------------|-------------------------------------------|-------------------------------------------------------|
| ACT Special Needs Offender Program                         | Yes                                           | 1              | 20                          | Unknown                                   | Department of Corrections                             |
| Forensic Diversion Program, Special Needs Offender Program | Yes                                           | 1              | 20                          | Unknown                                   | Department of Corrections                             |
| Specialized Supervision Forensic Program                   | Yes                                           | 40             | 100                         | 10                                        | Department of Corrections                             |
| Mental Health Treatment Court                              | Yes                                           | 40             | 100                         | 10                                        | Department of Corrections                             |
| Integrated Forensic Team                                   | Yes                                           | 40             | 90                          | 3                                         | State mental health grant                             |
| Citywide Case Management Forensics                         | No                                            | 40             | 30                          | 10                                        | Department of Corrections                             |
| STAR Program                                               | Yes                                           | 40             | 100                         | 8                                         | Department of Corrections                             |
| FOREST (Forensic Resource Team)                            | No                                            | 40             | 50                          | 6                                         | State mental health grant                             |
| FACT                                                       | Yes                                           | 20             | 20-40                       | 3                                         | Department of Corrections                             |
| Columbia River Mental Health                               | Yes                                           | 25             | 20                          | 3                                         | Department of Corrections                             |
| Center Star ACT                                            | Yes                                           | 40             | 100                         | 2                                         | Community mental health                               |
| WIT (Whatever It Takes)                                    | No                                            | 40             | 40-60                       | 2                                         | Department of Corrections                             |
| Competency Restoration Program, ADAPT of TX                | Yes                                           | 1              | 20                          | 1                                         | Department of Corrections                             |
| Mentally Ill Offender Reduction Program                    | No                                            | 20             | 20-30                       | <1                                        | State mental health grant                             |
| Telecare FACT Program                                      | Yes                                           | 40             | 100                         | <1                                        | Community mental health and Department of Corrections |

## APPENDIX E

### Forensic assertive community treatment patient characteristics across all programs

| Patient Characteristic                                                | Results       |
|-----------------------------------------------------------------------|---------------|
| Patient gender across all programs (mean $\pm$ SD)                    |               |
| Males                                                                 | 70% $\pm$ 14% |
| Patient diagnostic breakdown across programs (mean $\pm$ SD)          |               |
| Schizophrenia or schizoaffective disorder                             | 55% $\pm$ 28% |
| Bipolar disorder                                                      | 25% $\pm$ 20% |
| Co-occurring substance use disorder                                   | 77% $\pm$ 33% |
| Co-occurring antisocial personality disorder                          | 20% $\pm$ 21% |
| Co-occurring antisocial personality traits                            | 66% $\pm$ 38% |
| Percent of ethnic/racial minority patients (mean $\pm$ SD)            | 43% $\pm$ 24% |
| Percent of patients homeless at admission (mean $\pm$ SD)             | 61% $\pm$ 39% |
| Percent of patients with previous incarcerations (mean $\pm$ SD)      | 93% $\pm$ 15% |
| Percent of patients with previous felony convictions (mean $\pm$ SD)  | 47% $\pm$ 34% |
| Percent of patients with previous violent crimes (mean $\pm$ SD)      | 23% $\pm$ 22% |
| Percent of patients on probation at time of admission (mean $\pm$ SD) | 75% $\pm$ 27% |
| Percent of patients on parole at time of admission (mean $\pm$ SD)    | 16% $\pm$ 29% |
