# Supplementary material for: The Role of Probation in Forensic Assertive Community Treatment
Source: Atypon-hosted journal article supplement (doi:10.1176/ps.62.4.pss6204_0418), 2011-04-01
Supplement: Lamberti_ds3.pdf [file Lamberti_ds3.pdf]

## **APPENDIX F**

### **Additional Study Details**

As presented in the published manuscript, this study identified 61 ACT teams, from which a sample of 27 FACT programs that met study criteria was identified. From this group of 27 FACT program, a total of 15 programs was selected for study inclusion. In identifying the 61 ACT teams, the most common fidelity deviations were that the teams underutilized the provision of “in vivo” services in the community, and that they had high client to psychiatrist and staff ratios. In selecting 27 FACT programs from among the 61 ACT teams, the most common reason for exclusion was that the teams did not have formal ongoing relationships with a criminal justice agency. The ACT teams interfaced with criminal justice agencies only occasionally, on an “as needed” basis, and therefore were not considered Forensic ACT (FACT) teams. Of the 27 programs meeting FACT criteria, 12 were excluded from the final study sample because they did not have a probation officer who regularly attended team meetings.
